# Supplementary material
Source: publisher figshare collection journal article supplement (https://acs.figshare.com/ndownloader/files/4473847)
Supplement: Supplementary file 1 [file 4473847]

## A Versatile Approach to Fabricate Ordered Heterogeneous Bull's-eye-like Microstructure Arrays

Difu Zhu, Xiao Li, Gang Zhang, Wei Li<sup>†</sup>, Xun Zhang, Xuemin Zhang, Tieqiang Wang, and Bai Yang\*

*State Key Laboratory for Supramolecular Structure and Materials, College of Chemistry, Jilin University, Changchun 130012, P. R. China*

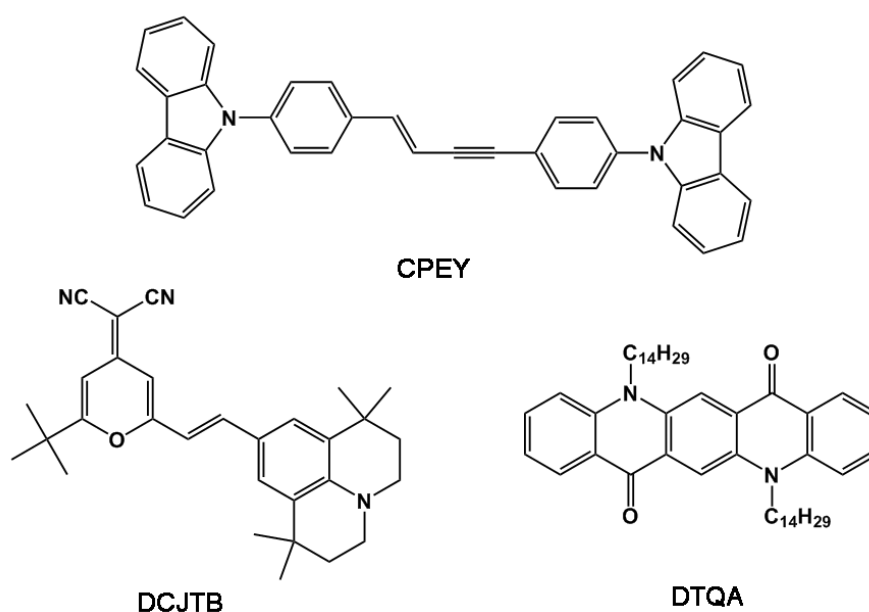

**schematics of the molecular structure**

(E)-9,9'-(4,4'-(but-1-en-3-yne-1,4-diyl)bis(4,1-phenylene))bis(9H-carbazole) (CPEY),  
4-(Dicyanomethylene)-2-tert-butyl-6-(1,1,7,7-tetramethyljulolidin-4-yl-vinyl)-4H-pyan (DCJTB)  
and 5,12-ditetradecylquinolino[2,3-b]acridine-7,14(5H,12H)-dione (DTQA).

\*Corresponding author. E-mail: [byangchem@jlu.edu.cn](mailto:byangchem@jlu.edu.cn)

<sup>†</sup> Current address: Max Planck Institute of Colloids and Interfaces, D-14424, Potsdam, Germany

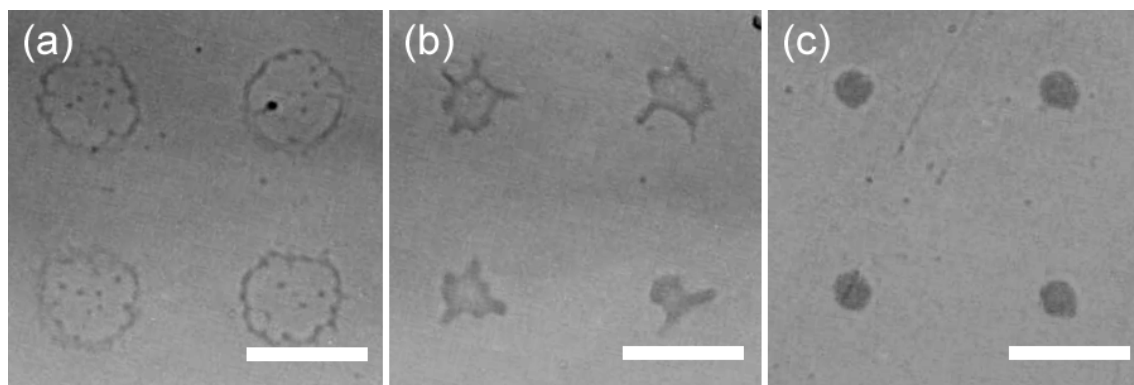

**Supporting Information Figure 1.** The corresponding optical micrographs verified the presentations of the mechanisms of dot arrays formation. After SAMs-induced dewetting, the disk-like thin films were observed in (a). With evaporation of chloroform, the disc-like films shrank incompletely under the role of surface tension in (b). Finally, after the solvent evaporated completely, the ordered dot arrays were obtained in (c).

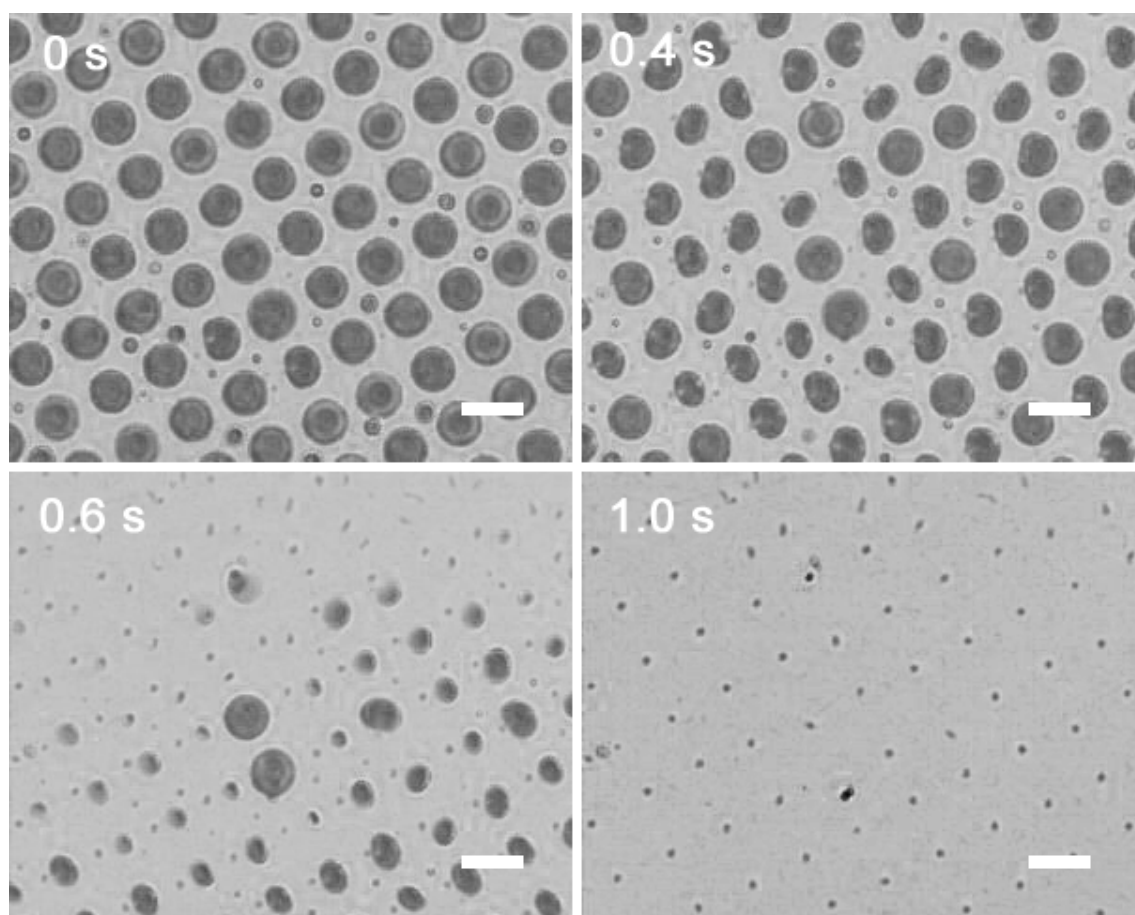

**Supporting Information Figure 2.** The inspection of water condensation on the patterned gold substrate was carried out in situ using an optical microscope: the ordered PVK dot arrays under the water droplets had been exposing gradually with the evaporation of water within 1.0 s. From serial figures, we could clearly see that the condensing water droplets on gold substrate are independent and stable in the hydrophilic regions of the circular area. It is indicated that the chemical properties of the SAMs have been reserved on the surface after formation of ordered PVK dot arrays by dip coating. The scale bar is 20  $\mu\text{m}$ .

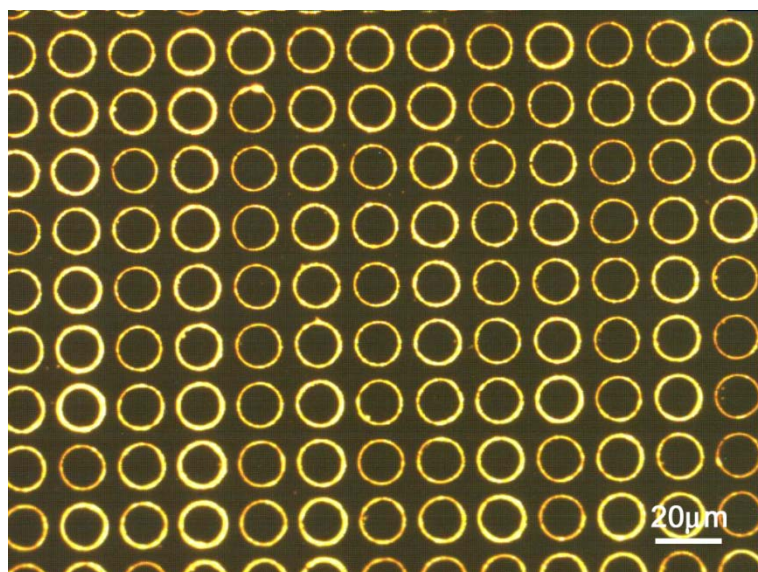

**Supporting Information Figure 3.** A fluorescent image of 2D ordered arrays of DTQA ring arrays that were fabricated by dipping a gold substrate with water-droplets-patterned surface in a  $0.5 \text{ mg mL}^{-1}$  DTQA solution in chloroform and withdrawing immediately, followed by complete evaporation of chloroform and water. From this figure, we could clearly observe that the DTQA ring arrays exhibit intensive yellow-green luminescence under UV excitation.
